# Supplementary material for: Site-Specific Labeling of Proteins with Near-IR Heptamethine Cyanine Dyes
Source: MDPI journal article supplement (doi:10.3390/molecules23112900), 2018-11-07
Supplement: s1 [file s1]

# SUPPORTING MATERIALS

## **Site-Specific Labeling Of Proteins With Near-IR Heptamethine Cyanine Dyes**

Chen-Ming Lin, Syed Muhammad Usama and Kevin Burgess\*

Department of Chemistry, Texas A & M University, Box 30012, College Station,  
TX 77842, USA

E-mail: [burgess@tamu.edu](mailto:burgess@tamu.edu)

## Table of Contents

|                     |    |
|---------------------|----|
| <b>A.3</b>          |    |
| <sup>1</sup> H NMR  | 3  |
| <sup>13</sup> C NMR | 3  |
| HRMS                | 4  |
| <b>B.5</b>          |    |
| <sup>1</sup> H NMR  | 5  |
| <sup>13</sup> C NMR | 5  |
| HRMS                | 6  |
| <b>C.7</b>          |    |
| <sup>1</sup> H NMR  | 7  |
| <sup>13</sup> C NMR | 7  |
| HRMS                | 8  |
| <b>D.9</b>          |    |
| <sup>1</sup> H NMR  | 9  |
| <sup>13</sup> C NMR | 9  |
| HRMS                | 10 |
| <b>E.11</b>         |    |

## A. Characterization Spectra of Compound 1a

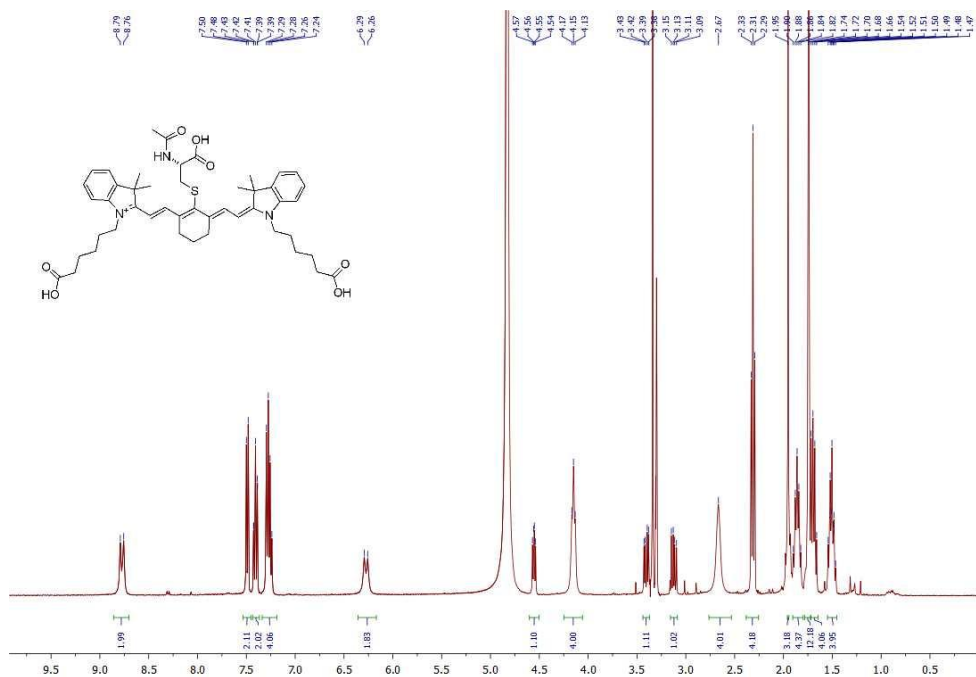

Figure S1. <sup>1</sup>H NMR of compound 1a in Methanol-d<sub>4</sub>

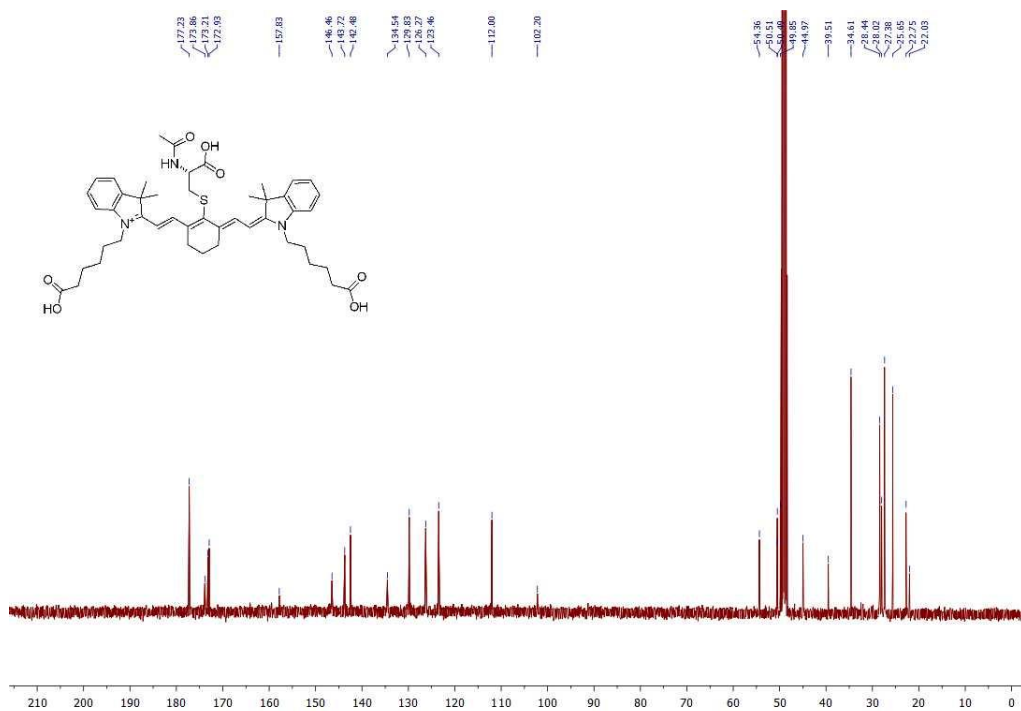

Figure S2. <sup>13</sup>C NMR of compound 1a in Methanol-d<sub>4</sub>

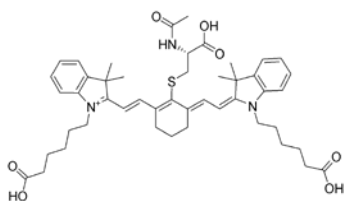

Chemical Formula:  $C_{47}H_{60}N_3O_7S^+$   
Exact Mass: 810.4146

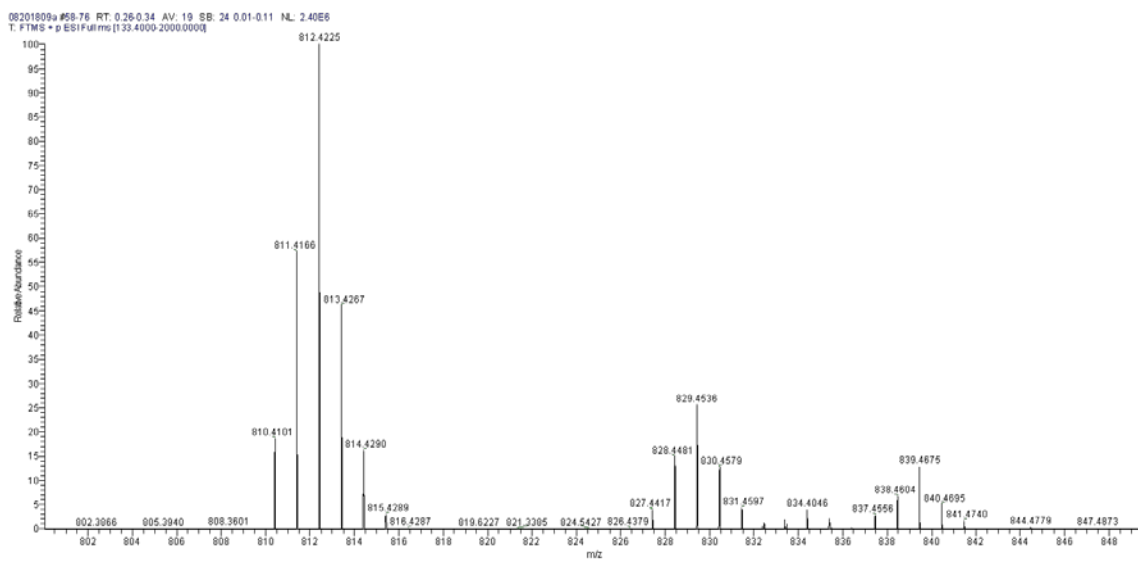

Figure S3. HRMS of compound 1a

## B. Characterization Spectra of Compound 1b

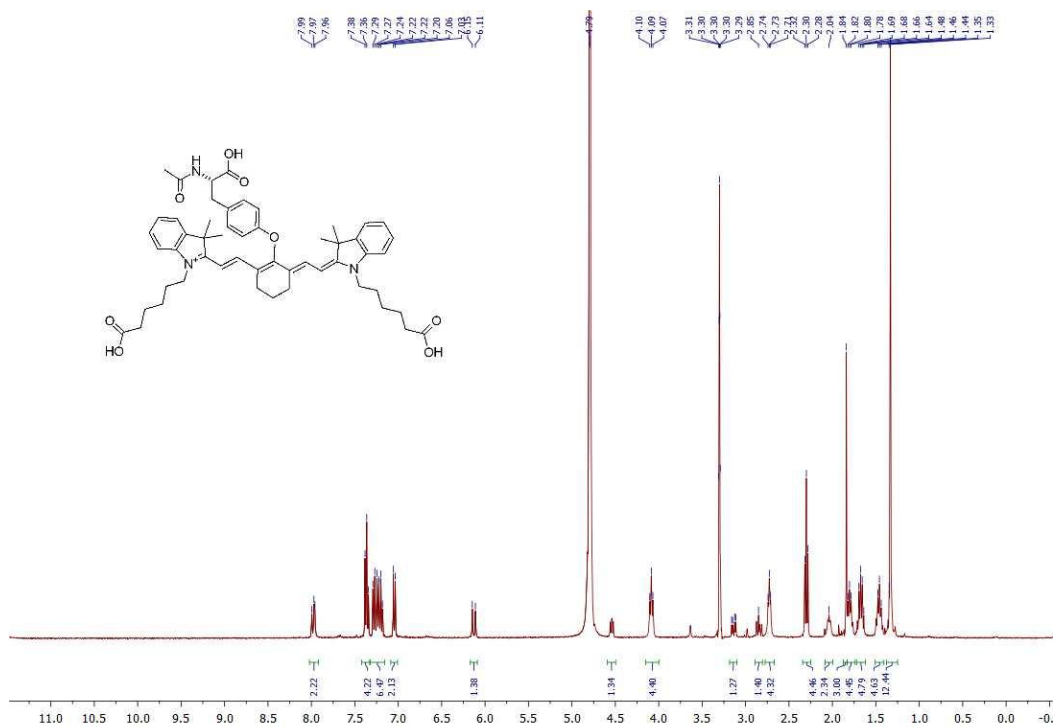

Figure S4. <sup>1</sup>H NMR of compound 1b in Methanol-d<sub>4</sub>

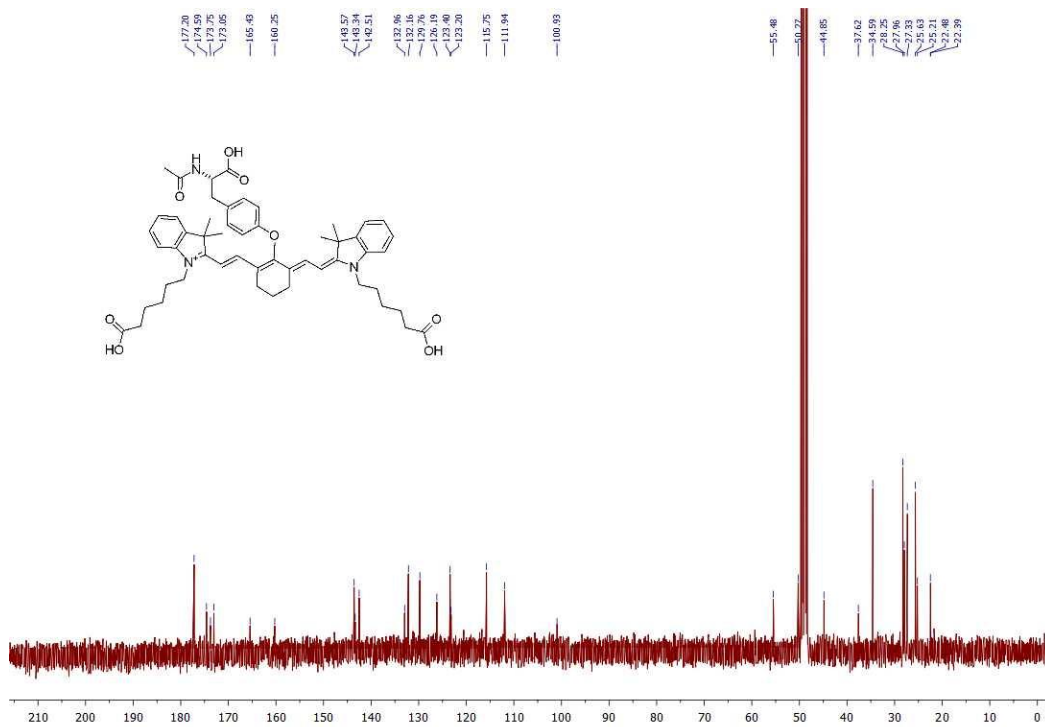

Figure S5. <sup>13</sup>C NMR of compound 1b in Methanol-d<sub>4</sub>

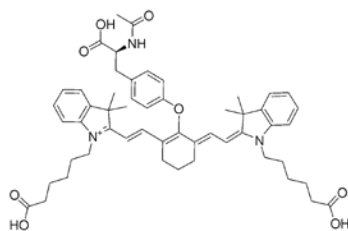

Chemical Formula:  $C_{53}H_{64}N_3O_8^+$   
Exact Mass: 870.4688

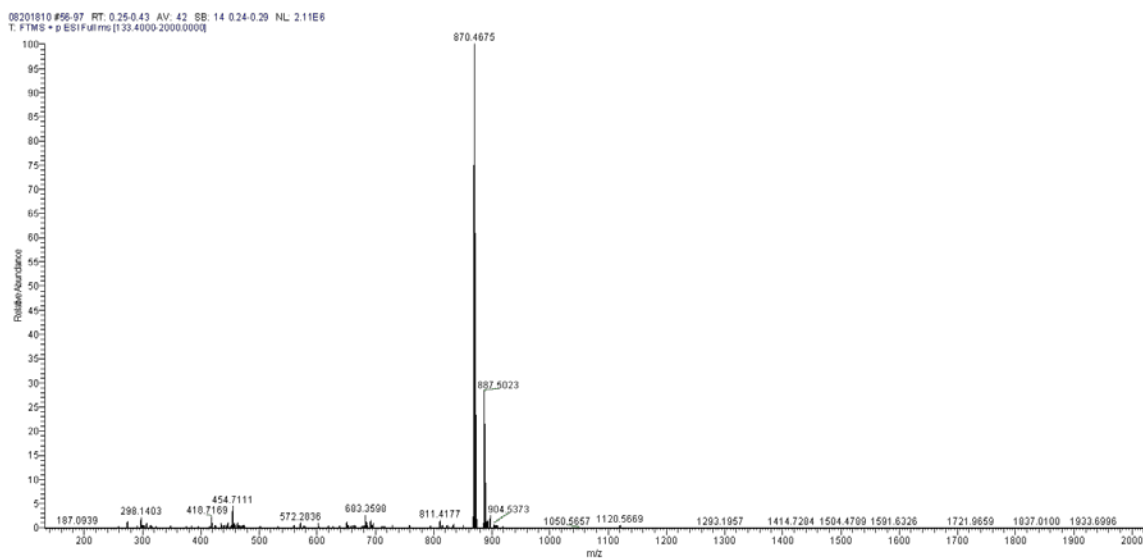

Figure S6.  $^1H$  NMR of compound 1b

### C. Characterization Spectra of Compound 1c

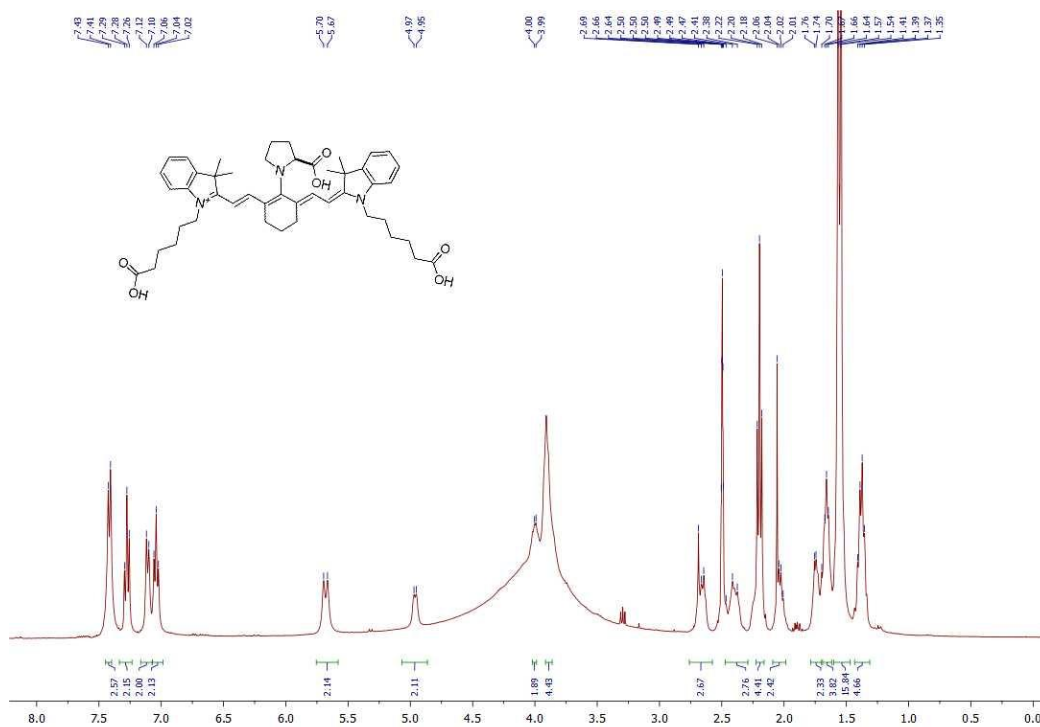

Figure S7. <sup>1</sup>H NMR of compound 1c in Methanol-d<sub>4</sub>

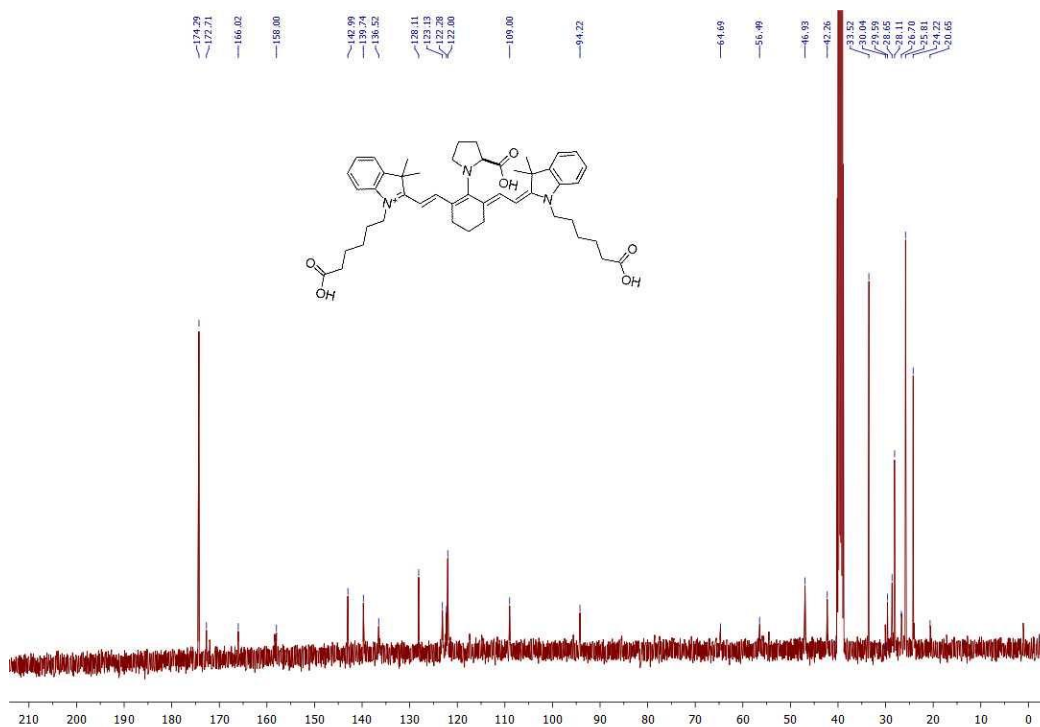

Figure S8. <sup>13</sup>C NMR of compound 1c in Methanol-d<sub>4</sub>

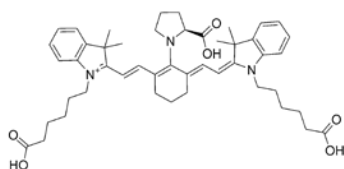

Chemical Formula:  $C_{47}H_{60}N_3O_6^+$   
Exact Mass: 762.4477

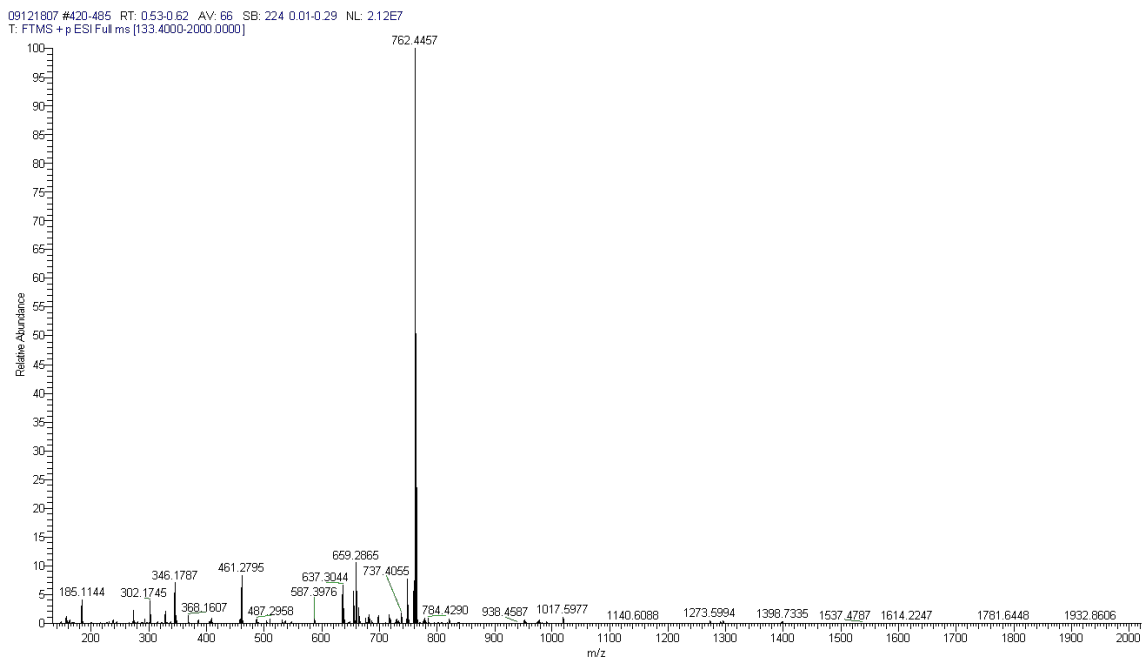

Figure S9. HRMS of compound 1c



## D. Characterization Spectra of Compound 1d

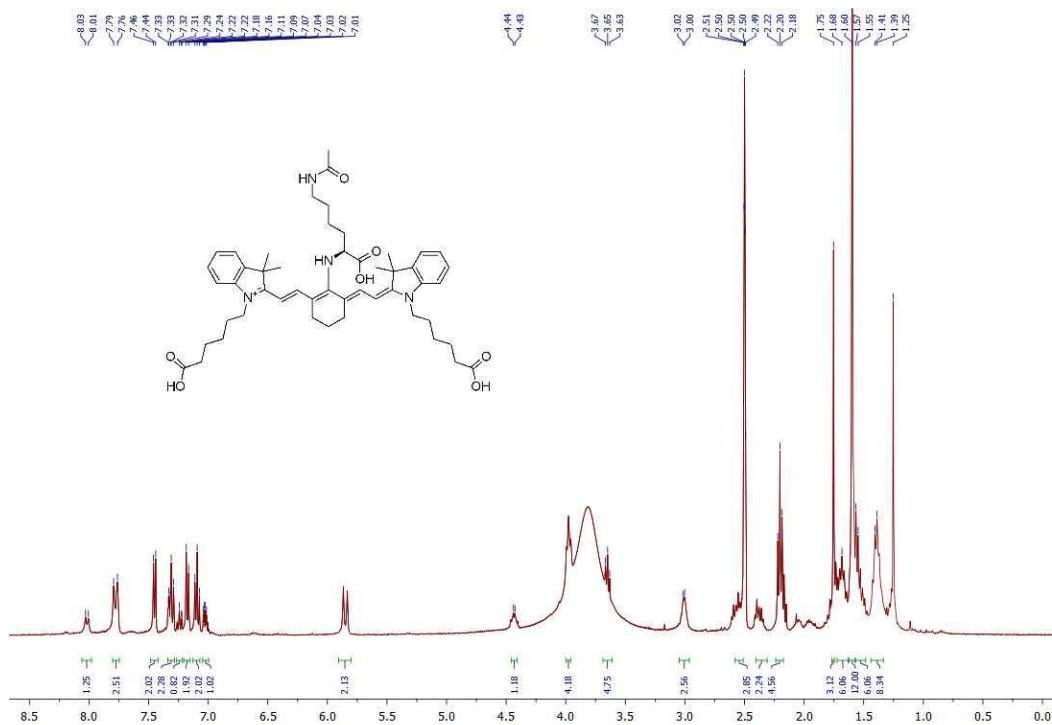

Figure S10. <sup>1</sup>H NMR of compound 1d in Methanol-d<sub>4</sub>

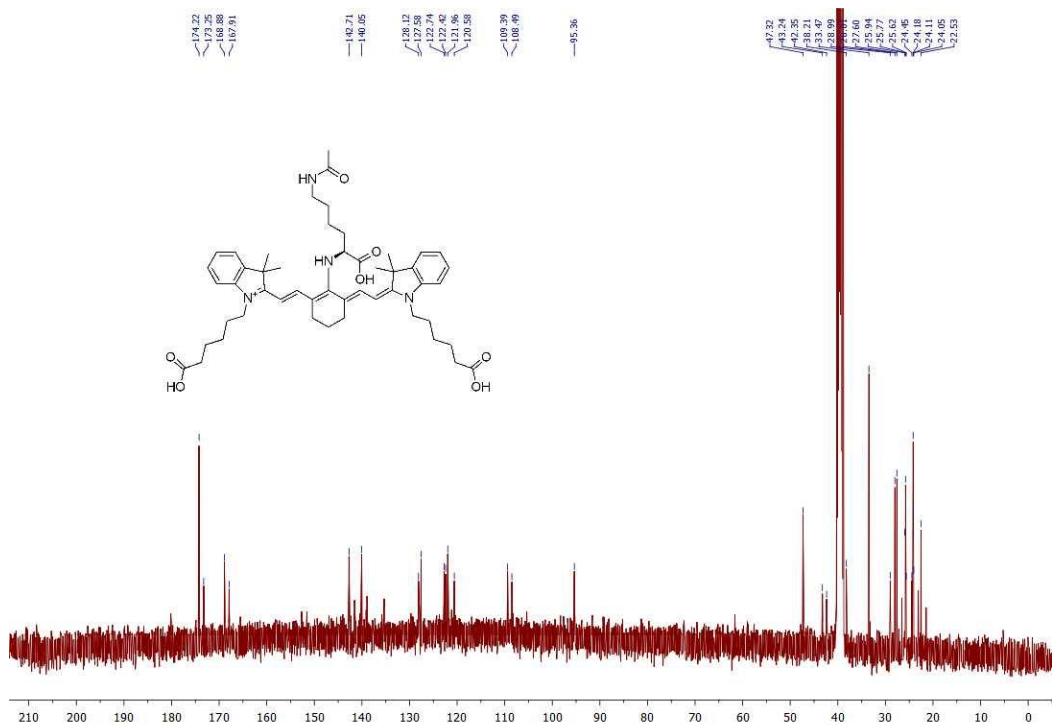

Figure S11. <sup>13</sup>C NMR of compound 1d in Methanol-d<sub>4</sub>

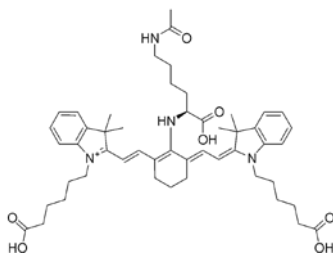

Chemical Formula:  $C_{50}H_{67}N_4O_7^+$   
Exact Mass: 835.5004

09171809.s #1593-1817 RT: 2.01-2.30 AV: 225 SB: 394 0.02-0.52 NL: 5.40E7  
T: FTMS +p ESI Full ms [100.0000-1000.0000]

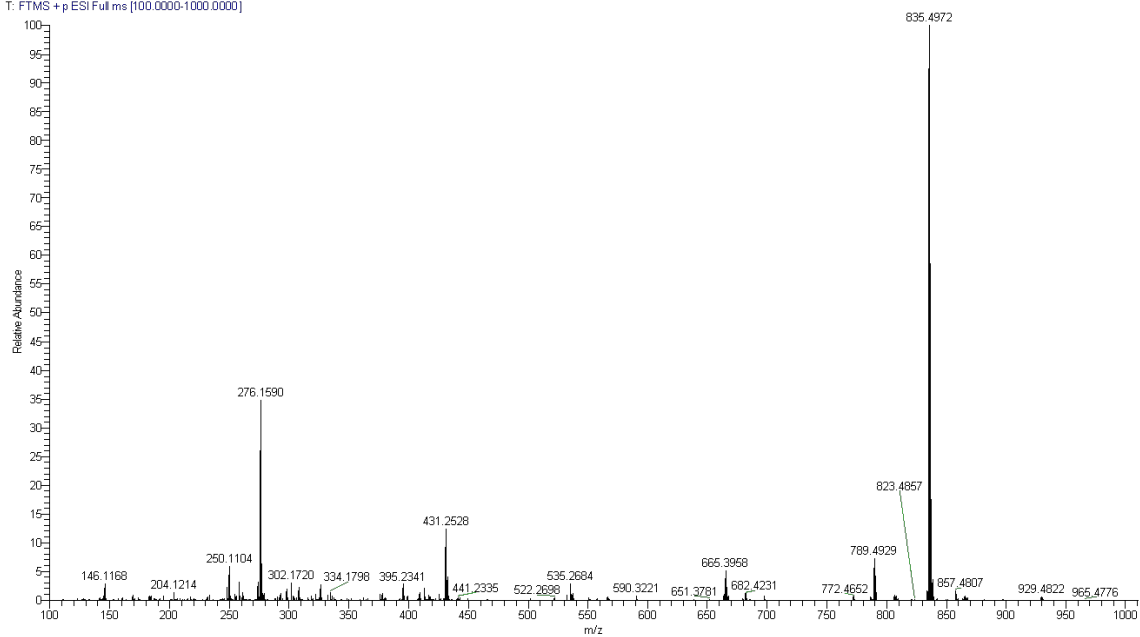

Figure S12. HRMS of compound 1d

## E. Coomassie Blue Staining of Diverse Proteins Gel

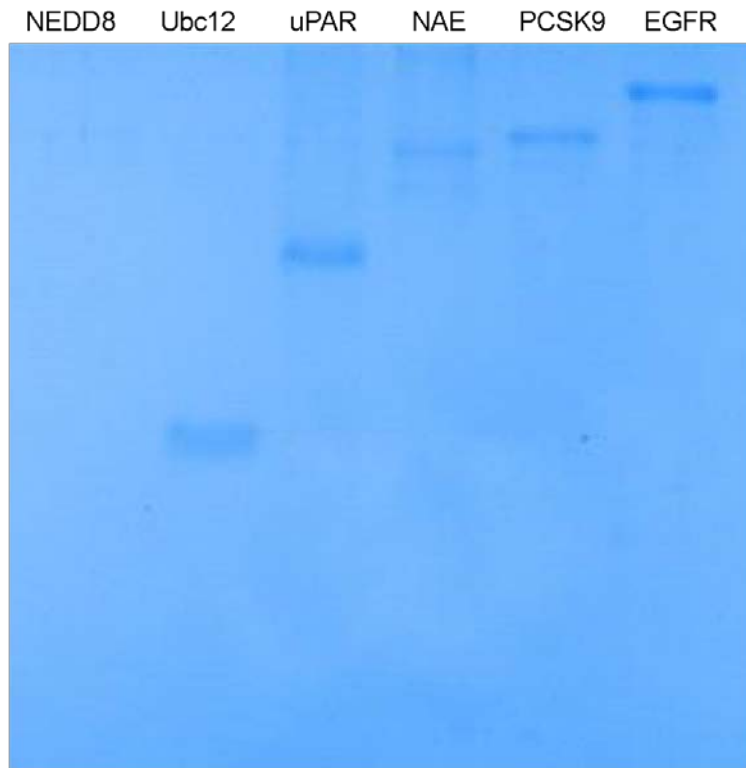

**Figure S13.** CBB-G250 staining of SDS-PAGE gel referred to Figure 6.
